# Supplementary material for: Impact of androgen receptor pathway inhibitors on cognitive function in elderly patients treated for metastatic prostate cancer
Source: Research Square preprint supplement (doi:10.21203/rs.3.rs-5657760/v1), 2025-10-31
Supplement: Supplementary file 1 [file f2e516e0ead0b92aa50c941c.pdf]

Supplementary information

# Supplementary information 1: ADT+ARPI patients' baseline characteristics

|                                                | enzalutamide<br>n=49          | abiraterone acetate<br>n=25   | <i>p</i> |
|------------------------------------------------|-------------------------------|-------------------------------|----------|
| Demographic data                               |                               |                               |          |
| Age, years: mean (SD)                          | 77.5 (5.65)                   | 79.7 (6.75)                   | 0.164    |
| Married/cohabiting: n (%)                      | 42 (86%)                      | 17 (68%)                      | 0.137    |
| Education, years of schooling: mean (SD)       | 12.9 (3.76)                   | 11.9 (3.05)                   | 0.206    |
| Clinical data                                  |                               |                               |          |
| ECOG performance status                        | c                             | b                             | 0.213    |
| 0: n (%)                                       | 24 (52%)                      | 7 (30%)                       |          |
| 1: n (%)                                       | 19 (41%)                      | 13 (57%)                      |          |
| 2: n (%)                                       | 3 (7%)                        | 3 (3%)                        |          |
| Body mass index, kg/m <sup>2</sup> : mean (SD) | 28.5 (3.51) <sup>h</sup>      | 26.4 (3.27) <sup>d</sup>      | 0.017    |
| Charlson index: mean (SD)                      | 1.41 (1.27)                   | 0.76 (1.23)                   | 0.040    |
| Psychotropic drugs: n (%)                      | 7 (14%)                       | 2 (8%)                        | 0.709    |
| Analgesic drugs : n (%)                        | 11 (22%)                      | 5 (20%)                       | 1.000    |
| ADT duration, months: median (IQR)             | 13.10 (4.6-32.8) <sup>a</sup> | 11.30 (2.4-20.6) <sup>a</sup> | 0.559    |
| Previous treatment                             |                               |                               |          |
| Chemotherapy: n (%)                            | 1 (2%)                        | 2 (8%)                        | 0.262    |
| Radiotherapy: n (%)                            | 41 (84%)                      | 14 (56%)                      | 0.022    |
| Time since diagnosis, years: mean (SD)         | 13.7 (6.01)                   | 16.2 (8.19)                   | 0.180    |
| Testosterone, abnormal: n (%)                  | 44 (92%) <sup>a</sup>         | 20 (91%) <sup>c</sup>         | 1.000    |
| TSH, abnormal: n (%)                           | 6 (13%) <sup>d</sup>          | 1 (4%)                        | 0.408    |
| PSA, abnormal: n (%)                           | 31 (78%) <sup>g</sup>         | 18 (86%) <sup>d</sup>         | 0.518    |
| Gleason score                                  | a                             | f                             | 0.485    |
| 4-6: n (%)                                     | 10 (21%)                      | 12 (18%)                      |          |
| ≥7: n (%)                                      | 38 (79%)                      | 55 (82%)                      |          |
| D'Amico risk classification                    | e                             | f                             | 1.000    |
| low: n (%)                                     | 0 (0%)                        | 0 (0%)                        |          |
| intermediate: n (%)                            | 10 (23%)                      | 4 (21%)                       |          |
| high: n (%)                                    | 34 (77%)                      | 15 (79%)                      |          |
| Initially metastatic: n (%)                    | 11 (22%)                      | 6 (24%)                       | 1.000    |
| Geriatric data                                 |                               |                               |          |
| G8 screening tool: mean (SD)                   | 14.8 (2.92)                   | 14.3 (3.36)                   | 0.543    |
| IADL: mean (SD)                                | 5.64 (0.896)                  | 5.48 (1.19)                   | 0.551    |
| MNA: mean (SD)                                 | 26.4 (2.31) <sup>g</sup>      | 26.8 (1.38) <sup>h</sup>      | 0.415    |
| Timed up and go: mean (SD)                     | 3.67 (1.11)                   | 3.84 (0.80)                   | 0.462    |

Premorbid intellectual functioning and cognitive screening

|                  |                          |                          |       |
|------------------|--------------------------|--------------------------|-------|
| fNART: mean (SD) | 26.9 (6.97) <sup>a</sup> | 27.0 (6.14) <sup>b</sup> | 0.949 |
| MoCA: mean (SD)  | 23.9 (3.35)              | 24.2 (3.90)              | 0.810 |

Other PROs

|                                  |                          |                          |       |
|----------------------------------|--------------------------|--------------------------|-------|
| HADS – total, symptomatic: n (%) | 16 (33%) <sup>a</sup>    | 8 (35%) <sup>b</sup>     | 1.000 |
| depression: mean (SD)            | 4.05 (3.14) <sup>a</sup> | 4.28 (3.36) <sup>b</sup> |       |
| anxiety: mean (SD)               | 5.16 (3.11) <sup>a</sup> | 5.19 (3.16) <sup>b</sup> |       |
| ISI, symptomatic: n (%)          | 7 (15%) <sup>a</sup>     | 6 (26%) <sup>b</sup>     | 0.398 |
| FACIT-F, symptomatic: n (%)      | 20 (42%) <sup>a</sup>    | 10 (43%) <sup>b</sup>    | 1.000 |
| Visual analogue scale: mean (SD) | 2.23 (2.35) <sup>e</sup> | 2.60 (2.59) <sup>f</sup> | 0.591 |

ADT: patients treated with androgen deprivation therapy. ARPI: patients treated with androgen receptor pathway inhibitors. ECOG: Eastern Cooperative Oncology Group. FACIT-F: Functional Assessment of Chronic Illness Therapy – Fatigue. fNART: French National Adult Reading Test. HADS: Hospital Anxiety and Depression Scale. IADL: Instrumental Activities of Daily Life. IQR: interquartile range. ISI: Insomnia Severity Index. MoCA: Montréal Cognitive Assessment. MNA: Mini-Nutritional Assessment. PROs: Patient reported outcomes. PSA: prostatic specific antigen. SD: standard deviation. TSH: thyroid-stimulating hormone.

Missing data: <sup>a</sup>n=1 <sup>b</sup>n=2 <sup>c</sup>n=3 <sup>d</sup>n=4 <sup>e</sup>n=5 <sup>f</sup>n=6 <sup>g</sup>n=9 <sup>h</sup>n=10

**Supplementary information 2A:** Cognitive impairment (Z-scores) at baseline according to treatment group in ADT+ARPI patients (unadjusted)

|                                           | enzalutamide | abiraterone acetate |
|-------------------------------------------|--------------|---------------------|
|                                           | impaired     | impaired            |
| <b>Baseline</b>                           | n=49         | n=25                |
| Overall objective impairment <sup>1</sup> | 41% (19)     | 68% (17)            |
| Subjective impairment <sup>2</sup>        |              |                     |
| PCI                                       | 25% (12)     | 22% (5)             |
| PCA                                       | 17% (8)      | 26% (6)             |

PCI: Perceived cognitive abilities. PCI: Perceived cognitive impairment.

<sup>1</sup> Proportion of participants impaired in at least two objective domains according to ICCTF guidelines[13].

<sup>2</sup> Proportion of participants with a FACT-Cog – PCI and PCA score of ≤10th percentile of norms[27].

**Supplementary information 2B:** Cognitive decline (RCI) during follow-up according to treatment group in ADT+ARPI patients (unadjusted)

|                                        | enzalutamide | abiraterone acetate |
|----------------------------------------|--------------|---------------------|
|                                        | declined     | declined            |
| <b>3-month</b>                         | n=49         | n=25                |
| Overall objective decline <sup>1</sup> | 4% (2)       | 0% (0)              |
| Subjective decline <sup>2</sup>        |              |                     |
| PCI                                    | 27% (12)     | 19% (4)             |
| PCA                                    | 27% (12)     | 23% (5)             |
| <b>6-month</b>                         | n=36         | n=18                |
| Overall objective decline <sup>1</sup> | 6% (2)       | 6% (1)              |
| Subjective decline <sup>2</sup>        |              |                     |
| PCI                                    | 34% (12)     | 33% (5)             |
| PCA                                    | 37% (13)     | 67% (10)            |
| <b>12-month</b>                        | n=27         | n=15                |
| Overall objective decline <sup>1</sup> | 4% (1)       | 0% (0)              |
| Subjective decline <sup>2</sup>        |              |                     |
| PCI                                    | 42% (11)     | 38% (5)             |
| PCA                                    | 46% (12)     | 31% (4)             |

PCI: Perceived cognitive abilities. PCI: Perceived cognitive impairment.

<sup>1</sup> Proportion of participants declining in at least two objective domains according to RCI

<sup>2</sup> Proportion of participants with a FACT-Cog – PCI and PCA score decreasing ≥10% from baseline

**Supplementary information 3:** Multivariable associations of baseline characteristics and PROs with variation in Z-scores during 12 months of treatment in ADT+ARPI patients

|                                         | baseline  |          | 3-month   |          | 6-month   |          | 12-month  |          |
|-----------------------------------------|-----------|----------|-----------|----------|-----------|----------|-----------|----------|
|                                         | $\beta^1$ | <i>p</i> | $\beta^2$ | <i>p</i> | $\beta^2$ | <i>p</i> | $\beta^2$ | <i>p</i> |
| <b>fNART</b>                            |           |          |           |          |           |          |           |          |
| Processing speed/attention              | 0.080     | 0.001    | 0.001     | 0.965    | 0.062     | 0.021    | 0.042     | 0.082    |
| Working memory                          | 0.029     | 0.082    | 0.034     | 0.016    | 0.036     | 0.022    | 0.026     | 0.121    |
| Verbal memory                           | 0.039     | 0.200    | -0.005    | 0.836    | 0.056     | 0.095    | 0.005     | 0.881    |
| Visual memory                           | 0.009     | 0.631    | 0.023     | 0.208    | 0.032     | 0.076    | 0.031     | 0.172    |
| Visuospatial abilities                  | 0.067     | 0.007    | NA        | NA       | 0.055     | 0.086    | 0.011     | 0.693    |
| Executive functions                     | 0.112     | <0.001   | -0.003    | 0.890    | 0.027     | 0.322    | 0.049     | 0.069    |
| <b>HADS - depression</b>                |           |          |           |          |           |          |           |          |
| Working memory                          | -0.028    | 0.254    | NA        | NA       | NA        | NA       | NA        | NA       |
| Visual memory                           | NA        | NA       | -0.014    | 0.623    | NA        | NA       | NA        | NA       |
| Visuospatial abilities                  | NA        | NA       | NA        | NA       | NA        | NA       | -0.050    | 0.198    |
| Executive functions                     | NA        | NA       | -0.080    | 0.014    | -0.017    | 0.626    | NA        | NA       |
| PCI                                     | -0.883    | 0.024    | 0.072     | 0.808    | -0.124    | 0.805    | NA        | NA       |
| PCA                                     | -0.345    | 0.135    | -0.190    | 0.248    | NA        | NA       | NA        | NA       |
| <b>FACIT-F</b>                          |           |          |           |          |           |          |           |          |
| Visual memory                           | NA        | NA       | 0.016     | 0.151    | NA        | NA       | 0.030     | 0.021    |
| Visuospatial abilities                  | NA        | NA       | 0.021     | 0.048    | NA        | NA       | NA        | NA       |
| PCI                                     | 0.273     | 0.101    | 0.257     | 0.036    | 0.400     | 0.079    | 0.356     | 0.124    |
| PCA                                     | 0.123     | 0.168    | -0.021    | 0.764    | 0.009     | 0.915    | 0.215     | 0.014    |
| <b>G8 screening tool</b>                |           |          |           |          |           |          |           |          |
| Processing speed/attention              | 0.112     | 0.007    | 0.024     | 0.546    | NA        | NA       | NA        | NA       |
| Working memory                          | 0.030     | 0.380    | 0.023     | 0.328    | NA        | NA       | NA        | NA       |
| PCI                                     | NA        | NA       | NA        | NA       | 0.623     | 0.509    | NA        | NA       |
| PCA                                     | 0.308     | 0.276    | NA        | NA       | NA        | NA       | -0.695    | 0.086    |
| <b>IADL</b>                             |           |          |           |          |           |          |           |          |
| Processing speed/attention              | NA        | NA       | 0.011     | 0.923    | NA        | NA       | NA        | NA       |
| PCI                                     | NA        | NA       | NA        | NA       | 1.867     | 0.522    | NA        | NA       |
| PCA                                     | NA        | NA       | NA        | NA       | NA        | NA       | 1.172     | 0.343    |
| <b>HADS - anxiety</b>                   |           |          |           |          |           |          |           |          |
| PCI                                     | NA        | NA       | NA        | NA       | -0.347    | 0.524    | NA        | NA       |
| PCA                                     | -0.335    | 0.168    | NA        | NA       | NA        | NA       | NA        | NA       |
| <b>ISI</b>                              |           |          |           |          |           |          |           |          |
| PCI                                     | -0.385    | 0.138    | -0.029    | 0.882    | 0.372     | 0.258    | NA        | NA       |
| PCA                                     | 0.006     | 0.967    | -0.131    | 0.220    | NA        | NA       | -0.137    | 0.242    |
| <b>Pre-baseline ADT duration</b>        |           |          |           |          |           |          |           |          |
| Verbal memory                           | NA        | NA       | NA        | NA       | 0.001     | 0.958    | 0.001     | 0.900    |
| Visuospatial abilities                  | NA        | NA       | NA        | NA       | -0.010    | 0.079    | -0.007    | 0.147    |
| <b>Visual analogue scale</b>            |           |          |           |          |           |          |           |          |
| PCI                                     | NA        | NA       | NA        | NA       | -0.153    | 0.861    | NA        | NA       |
| PCA                                     | NA        | NA       | NA        | NA       | -0.350    | 0.268    | NA        | NA       |
| <b>Charlson index</b>                   |           |          |           |          |           |          |           |          |
| Executive functions                     | -0.133    | 0.226    | NA        | NA       | NA        | NA       | NA        | NA       |
| <b>Treated with abiraterone acetate</b> |           |          |           |          |           |          |           |          |
| PCA                                     | NA        | NA       | NA        | NA       | -2.564    | 0.055    | NA        | NA       |
| <b>Treated with enzalutamide</b>        |           |          |           |          |           |          |           |          |
| Visual memory                           | NA        | NA       | NA        | NA       | NA        | NA       | -0.013    | 0.953    |

ADT: androgen deprivation therapy. FACIT-F: Functional Assessment of Chronic Illness Therapy - Fatigue. fNART: French National Adult Reading Test. HADS: Hospital Anxiety and Depression Scale. IADL: Instrumental Activities of Daily Life. ISI: Insomnia Severity Index. PCI: Perceived cognitive abilities. PCA: Perceived cognitive impairment.

NA Not applicable for factors that were not predictive in univariable models. Factors that were not predictive for any domain are not shown.

<sup>1</sup> Models adjusted on baseline age and education.

<sup>2</sup> Models adjusted on baseline age, education and cognition.

#### Supplementary information 4: Criteria for estimating frequency of cognitive impairment and decline

##### 1. Frequency of overall objective cognitive impairment at baseline

For objective cognition, Z-scores were calculated for each cognitive measure using HC scores as a reference

$$z = \frac{X_p - \overline{X_{HC}}}{S_{HC}} \quad (1)$$

z: individual Z-score, where  $X_p$  is the score of the patient,  $\overline{X_{HC}}$  and  $S_{HC}$  are the mean score and the standard deviation of HC, respectively.

The frequency of objective cognitive impairment was estimated as follows: (1) the proportion of participants with a Z-score  $\leq -2SD$  was calculated for each measure, (2) the proportion of participants with a Z-score  $\leq -1.5SD$  in at least two measures or  $\leq -2SD$  in at least one measure was calculated for each objective domain, and (3) the proportion of patients impaired in at least two domains was calculated to obtain an estimate of the frequency of overall objective cognitive impairment.

##### 2. Frequency of overall objective cognitive decline during follow-up

The frequency of objective cognitive decline was estimated as follows: (1) individual Reliable change indexes (RCI) were calculated using the baseline measures as a reference and variations in HC measures as a correction for the practice effect, then the proportion of participants with a RCI  $\leq -1.645$  was calculated for each measure, (2) the proportion of participants with a composite RCI (the mean RCI of the corresponding measures)  $\leq -1.645$  was calculated for each objective domain, and (3) the proportion of patients impaired in at least two domains was calculated to obtain an estimate of overall objective decline.

$$SED = \sqrt{2(S1_p \sqrt{1-r})^2} \quad (2.1)$$

SED: standard error of the difference, where  $S1_p$  is the standard deviation of patients at baseline, and  $r$  is the correlation between the baseline and follow-up scores.

$$RCI = (X2_p - X1_p) - \frac{(\overline{X2_{HC}} - \overline{X1_{HC}})}{SED} \quad (2.2)$$

RCI: individual reliable change index, where  $X1_p$  and  $X2_p$  are the scores of patient at baseline and during follow-up, respectively, and  $\overline{X1_{HC}}$  and  $\overline{X2_{HC}}$  are the mean scores of HC at baseline and during follow-up, respectively.

### *3. Frequency of subjective impairment at baseline and subjective decline during follow-up*

Subjective cognition was assessed with the raw scores of the Perceived cognitive impairment (PCI) and Perceived cognitive abilities (PCA) subscales of the Functional Assessment of Cancer Therapy - Cognitive Function (FACT-Cog).

The frequency of subjective impairment was estimated separately for PCI and PCA by calculating the proportion of participants scoring  $\leq 10$ th percentile of published norms.

The frequency of subjective decline was estimated separately of PCI and PCA by calculating the proportion of participants with a score decreasing  $\geq 10\%$  from baseline.

# Supplementary information 5A: Raw scores and Z-scores for cognitive impairment at baseline (unadjusted)

|                                                       | All patients (ADT+/-ARPI)<br>n=93 |        |          | ADT+ARPI<br>n=74 |        |          | ADT<br>n=19 |        |          | HC<br>n=30  |          |
|-------------------------------------------------------|-----------------------------------|--------|----------|------------------|--------|----------|-------------|--------|----------|-------------|----------|
|                                                       | mean (SD)                         | z      | impaired | mean (SD)        | z      | impaired | mean (SD)   | z      | impaired | mean (SD)   | impaired |
| Overall objective impairment <sup>1</sup>             |                                   |        | 46%      |                  |        | 51%      |             |        | 26%      |             | 10%      |
| Processing speed/attention                            |                                   | -0.977 | 24%      |                  | -1.171 | 28%      |             | -0.221 | 5%       |             | 3%       |
| Digit symbol-coding (WAIS-III): correct reproductions | 45.1 (13.0)                       | -0.988 | 16%      | 42.9 (12.6)      | -1.149 | 19%      | 53.5 (10.9) | -0.364 | 5%       | 58.4 (13.4) | 0%       |
| TMT: time A                                           | 54.6 (24.4)                       | -0.966 | 17%      | 57.8 (25.9)      | -1.193 | 22%      | 42.1 (10.8) | 0.079  | 0%       | 41.1 (13.9) | 3%       |
| Working memory                                        |                                   | -0.530 | 8%       |                  | -0.487 | 4%       |             | -0.700 | 21%      |             | 0%       |
| Digit span (WAIS-III): score forward                  | 7.6 (1.7)                         | -0.629 | 4%       | 7.7 (1.6)        | -0.567 | 1%       | 7.2 (2.3)   | -0.874 | 16%      | 8.8 (1.9)   | 0%       |
| Digit span (WAIS-III): score backward                 | 4.9 (1.7)                         | -0.431 | 0%       | 5.0 (1.7)        | -0.407 | 0%       | 4.6 (1.7)   | -0.526 | 0%       | 5.8 (2.1)   | 0%       |
| Verbal memory                                         |                                   | -0.880 | 34%      |                  | -1.055 | 42%      |             | -0.216 | 5%       |             | 10%      |
| Grober-Buschke test: sum of three free recalls        | 22.4 (7.0)                        | -0.676 | 11%      | 21.6 (7.2)       | -0.819 | 14%      | 25.7 (4.9)  | -0.134 | 0%       | 26.4 (5.8)  | 0%       |
| Grober-Buschke test: sum of three total recalls       | 43.0 (5.0)                        | -0.771 | 12%      | 42.4 (5.4)       | -0.953 | 15%      | 45.0 (2.3)  | -0.079 | 0%       | 45.3 (3.1)  | 3%       |
| Grober-Buschke test: free delayed recall              | 8.6 (3.2)                         | -0.848 | 18%      | 8.2 (3.4)        | -0.999 | 22%      | 10.1 (1.8)  | -0.273 | 0%       | 10.7 (2.5)  | 3%       |
| Grober-Buschke test: total delayed recall             | 14.5 (1.9)                        | -1.224 | 23%      | 14.3 (2.0)       | -1.448 | 28%      | 15.3 (0.8)  | -0.376 | 5%       | 15.6 (0.8)  | 3%       |
| Visual memory                                         |                                   | 0.015  | 9%       |                  | -0.053 | 11%      |             | 0.279  | 0%       |             | 7%       |
| Doors test: test A                                    | 10.0 (1.6)                        | -0.135 | 5%       | 9.8 (1.7)        | -0.239 | 7%       | 10.7 (0.9)  | 0.271  | 0%       | 10.2 (1.8)  | 7%       |
| Doors test: test B                                    | 5.9 (2.0)                         | 0.164  | 3%       | 5.9 (2.0)        | 0.133  | 4%       | 6.2 (2.0)   | 0.286  | 0%       | 5.5 (1.9)   | 0%       |
| Visuospatial abilities                                |                                   | -0.408 | 29%      |                  | -0.412 | 30%      |             | -0.396 | 26%      |             | 7%       |
| Rey-Osterrieth complex figure: copy score             | 29.3 (5.5)                        | -0.153 | 10%      | 29.1 (5.5)       | -0.180 | 10%      | 29.7 (5.7)  | -0.052 | 11%      | 29.8 (4.3)  | 3%       |
| Number location (VOSP): total score                   | 8.6 (1.7)                         | -0.645 | 25%      | 8.6 (1.6)        | -0.621 | 26%      | 8.5 (2.1)   | -0.739 | 21%      | 9.1 (0.8)   | 7%       |
| Executive functions                                   |                                   | -0.901 | 59%      |                  | -1.004 | 60%      |             | -0.518 | 58%      |             | 20%      |
| TMT: time B/A                                         | 2.9 (1.1)                         | -0.542 | 15%      | 2.8 (1.1)        | -0.475 | 15%      | 3.1 (1.0)   | -0.769 | 16%      | 2.5 (0.7)   | 3%       |
| TMT: errors B                                         | 1.0 (1.2)                         | -1.372 | 29%      | 1.0 (1.2)        | -1.375 | 27%      | 1.0 (0.9)   | -1.360 | 37%      | 0.3 (0.7)   | 0%       |
| Stroop Victoria: time interference/colors             | 2.7 (1.2)                         | -0.702 | 15%      | 2.8 (1.3)        | -0.826 | 16%      | 2.4 (0.6)   | -0.247 | 11%      | 2.3 (0.6)   | 7%       |
| Stroop Victoria: total errors interference            | 1.8 (2.7)                         | -1.072 | 27%      | 2.1 (2.9)        | -1.292 | 30%      | 0.9 (1.4)   | -0.248 | 16%      | 0.7 (1.0)   | 10%      |
| Verbal fluencies: letter fluency                      | 18.2 (7.4)                        | -0.814 | 15%      | 17.8 (7.2)       | -0.876 | 17%      | 19.7 (8.1)  | -0.583 | 11%      | 23.4 (6.4)  | 0%       |
| Verbal fluencies: category fluency                    | 23.6 (8.3)                        | -0.749 | 22%      | 22.4 (7.8)       | -0.973 | 25%      | 28.4 (8.6)  | 0.101  | 11%      | 27.8 (5.7)  | 3%       |
| Subjective impairment <sup>2</sup>                    |                                   |        |          |                  |        |          |             |        |          |             |          |
| FACT-Cog: PCI                                         | 57.8 (12.1)                       |        | 24%      | 57.4 (11.6)      |        | 24%      | 59.7 (14)   |        | 22%      | 63.1 (5.6)  | 7%       |
| FACT-Cog: PCA                                         | 18.9 (5.8)                        |        | 18%      | 18.3 (6.0)       |        | 20%      | 21.0 (4.2)  |        | 11%      | 19.6 (4.0)  | 7%       |

ADT: patients treated with androgen deprivation therapy. ARPI: patients treated with androgen receptor pathway inhibitors. FACT-Cog: Functional Assessment of Cancer Therapy - Cognitive Function. HC: healthy controls without cancer. PCA: Perceived cognitive abilities. PCI: Perceived cognitive impairment. SD: standard deviation. TMT: Trail-Making Test. VOSP: Visual Object and Space Perception Battery. WAIS-III: Wechsler Adult Intelligent Scale, third edition.

<sup>1</sup> Proportion of participants impaired in at least two objective domains.

<sup>2</sup> Proportion of participants with a FACT-Cog – PCI and PCA score ≤10th percentile of norms[27].



# Supplementary information 5B: Raw scores and RCI for cognitive decline at 3 months (unadjusted)

|                                                       | All patients (ADT+/-ARPI)<br>n=93 |        |          | ADT+ARPI<br>n=74 |        |          | ADT<br>n=19 |        |          | HC<br>n=30  |          |
|-------------------------------------------------------|-----------------------------------|--------|----------|------------------|--------|----------|-------------|--------|----------|-------------|----------|
|                                                       | mean (SD)                         | RCI    | declined | mean (SD)        | RCI    | declined | mean (SD)   | RCI    | declined | mean (SD)   | declined |
| Overall objective decline <sup>1</sup>                |                                   |        | 3%       |                  |        | 3%       |             |        | 5%       |             | 0%       |
| Processing speed/attention                            |                                   | -0.209 | 5%       |                  | -0.281 | 7%       |             | 0.063  | 0%       |             | 3%       |
| Digit symbol-coding (WAIS-III): correct reproductions | 43.6 (14.2)                       | -0.382 | 10%      | 41.1 (13.6)      | -0.452 | 12%      | 53.3 (12.3) | -0.115 | 0%       | 58.3 (15.1) | 7%       |
| TMT: time A                                           | 55.3 (22.3)                       | -0.009 | 11%      | 57.9 (23.5)      | -0.074 | 14%      | 45.4 (13.9) | 0.241  | 0%       | 42.0 (14.0) | 7%       |
| Working memory                                        |                                   | -0.304 | 2%       |                  | -0.411 | 3%       |             | 0.105  | 0%       |             | 0%       |
| Digit span (WAIS-III): score forward                  | 7.7 (1.8)                         | -0.338 | 20%      | 7.7 (1.9)        | -0.440 | 21%      | 7.8 (1.5)   | 0.054  | 16%      | 9.4 (2.28)  | 13%      |
| Digit span (WAIS-III): score backward                 | 4.7 (2.0)                         | -0.270 | 8%       | 4.6 (1.9)        | -0.381 | 10%      | 5.3 (2.1)   | 0.156  | 0%       | 6.1 (2.1)   | 3%       |
| Verbal memory                                         |                                   | 0.025  | 5%       |                  | 0.117  | 3%       |             | -0.323 | 11%      |             | 3%       |
| Grober-Buschke test: sum of three free recalls        | 22.5 (8.1)                        | -0.095 | 9%       | 21.7 (8.5)       | -0.089 | 10%      | 25.6 (5.2)  | -0.118 | 6%       | 26.8 (5.6)  | 10%      |
| Grober-Buschke test: sum of three total recalls       | 42.2 (5.8)                        | -0.013 | 12%      | 41.9 (6.0)       | 0.049  | 13%      | 43.2 (5.1)  | -0.253 | 11%      | 44.5 (3.4)  | 7%       |
| Grober-Buschke test: free delayed recall              | 8.8 (3.3)                         | -0.005 | 7%       | 8.6 (3.4)        | 0.094  | 4%       | 9.3 (2.8)   | -0.382 | 17%      | 10.7 (2.2)  | 3%       |
| Grober-Buschke test: total delayed recall             | 14.6 (2.1)                        | 0.138  | 10%      | 14.6 (2.1)       | 0.317  | 9%       | 14.7 (2.1)  | -0.539 | 17%      | 15.5 (0.8)  | 3%       |
| Visual memory                                         |                                   | -0.620 | 19%      |                  | -0.670 | 21%      |             | -0.430 | 11%      |             | 0%       |
| Doors test: test A                                    | 9.8 (1.9)                         | -0.503 | 22%      | 9.6 (1.9)        | -0.491 | 23%      | 10.5 (1.5)  | -0.551 | 16%      | 10.6 (1.5)  | 3%       |
| Doors test: test B                                    | 5.6 (2.2)                         | -0.744 | 31%      | 5.3 (2.2)        | -0.860 | 35%      | 6.5 (2.0)   | -0.308 | 16%      | 6.4 (2.1)   | 17%      |
| Visuospatial abilities                                |                                   | 0.077  | 1%       |                  | 0.044  | 1%       |             | 0.196  | 0%       |             | 0%       |
| Rey-Osterrieth complex figure: copy score             | 29.8 (4.2)                        | -0.106 | 6%       | 29.5 (4.3)       | -0.196 | 7%       | 31.3 (3.3)  | 0.234  | 0%       | 30.5 (3.6)  | 3%       |
| Number location (VOSP): total score                   | 8.8 (1.4)                         | 0.245  | 9%       | 8.8 (1.4)        | 0.268  | 8%       | 8.6 (1.7)   | 0.158  | 11%      | 9.1 (1.1)   | 10%      |
| Executive functions                                   |                                   | 0.132  | 0%       |                  | 0.209  | 0%       |             | -0.148 | 0%       |             | 0%       |
| TMT: time B/A                                         | 2.9 (1.2)                         | 0.124  | 13%      | 2.9 (1.3)        | 0.338  | 7%       | 2.6 (0.9)   | -0.587 | 33%      | 2.4 (0.6)   | 3%       |
| TMT: errors B                                         | 1.1 (1.5)                         | 0.162  | 6%       | 1.3 (1.6)        | 0.357  | 5%       | 0.6 (0.9)   | -0.489 | 11%      | 0.4 (0.7)   | 0%       |
| Stroop Victoria: time interference/colors             | 2.7 (1.2)                         | 0.098  | 14%      | 2.8 (1.3)        | 0.144  | 15%      | 2.3 (0.5)   | -0.066 | 11%      | 2.2 (0.5)   | 3%       |
| Stroop Victoria: total errors interference            | 2.1 (3.1)                         | 0.358  | 16%      | 2.3 (3.3)        | 0.392  | 16%      | 1.1 (1.6)   | 0.237  | 16%      | 0.6 (1.0)   | 10%      |
| Verbal fluencies: letter fluency                      | 17.7 (6.6)                        | -0.150 | 7%       | 17.7 (6.8)       | -0.080 | 6%       | 17.7 (6.2)  | -0.409 | 11%      | 23.6 (5.5)  | 7%       |
| Verbal fluencies: category fluency                    | 23.9 (7.9)                        | 0.216  | 6%       | 22.5 (7.2)       | 0.190  | 6%       | 29.0 (8.6)  | 0.310  | 5%       | 26.8 (6.2)  | 10%      |
| Subjective decline <sup>2</sup>                       |                                   |        |          |                  |        |          |             |        |          |             |          |
| FACT-Cog: PCI                                         | 56.2 (12.9)                       |        | 37%      | 54.8 (13.0)      |        | 42%      | 61.0 (11.8) |        | 17%      | 62.1 (6.8)  | 17%      |
| FACT-Cog: PCA                                         | 18.6 (5.1)                        |        | 41%      | 18.2 (5.1)       |        | 48%      | 20.1 (4.6)  |        | 17%      | 19.5 (4.8)  | 33%      |

ADT: patients treated with androgen deprivation therapy. ARPI: patients treated with androgen receptor pathway inhibitors. FACT-Cog: Functional Assessment of Cancer Therapy - Cognitive Function. HC: healthy controls without cancer. PCA: Perceived cognitive abilities. PCI: Perceived cognitive impairment. RCI: reliable change index. SD: standard deviation. TMT: Trail-Making Test. VOSP: Visual Object and Space Perception Battery. WAIS-III: Wechsler Adult Intelligent Scale, third edition.

<sup>1</sup> Proportion of participants declining in at least two objective domains.

<sup>2</sup> Proportion of participants with a FACT-Cog – PCI and PCA score decreasing ≥10% from baseline.

# Supplementary information 5C: Raw scores and RCI for cognitive decline at 6 months (unadjusted)

|                                                       | All patients (ADT+/-ARPI)<br>n=71 |        |          | ADT+ARPI<br>n=54 |        |          | ADT<br>n=17 |        |          | HC<br>n=28  |          |
|-------------------------------------------------------|-----------------------------------|--------|----------|------------------|--------|----------|-------------|--------|----------|-------------|----------|
|                                                       | mean (SD)                         | RCI    | declined | mean (SD)        | RCI    | declined | mean (SD)   | RCI    | declined | mean (SD)   | declined |
| Overall objective decline <sup>1</sup>                |                                   |        | 4%       |                  |        | 6%       |             |        | 0%       |             | 0%       |
| Processing speed/attention                            |                                   | -0.055 | 3%       |                  | -0.037 | 4%       |             | -0.117 | 0%       |             | 0%       |
| Digit symbol-coding (WAIS-III): correct reproductions | 46.4 (14.5)                       | -0.542 | 14%      | 43.1 (13.2)      | -0.654 | 17%      | 57.4 (13.3) | -0.172 | 6%       | 60.9 (14.5) | 4%       |
| TMT: time A                                           | 58.6 (33.5)                       | 0.618  | 10%      | 64.1 (35.9)      | 0.820  | 9%       | 40.3 (12.5) | -0.061 | 12%      | 41.8 (10.8) | 4%       |
| Working memory                                        |                                   | -0.174 | 3%       |                  | -0.236 | 4%       |             | 0.033  | 0%       |             | 0%       |
| Digit span (WAIS-III): score forward                  | 7.9 (2.0)                         | -0.037 | 3%       | 7.9 (1.9)        | -0.083 | 2%       | 7.9 (2.4)   | 0.121  | 6%       | 9.0 (2.0)   | 7%       |
| Digit span (WAIS-III): score backward                 | 5.1 (1.9)                         | -0.312 | 3%       | 5.0 (1.9)        | -0.388 | 2%       | 5.5 (1.3)   | -0.055 | 6%       | 6.4 (2.3)   | 0%       |
| Verbal memory                                         |                                   | 0.046  | 2%       |                  | 0.048  | 2%       |             | 0.040  | 0%       |             | 4%       |
| Grober-Buschke test: sum of three free recalls        | 24.2 (7.2)                        | 0.094  | 5%       | 23.2 (7.4)       | 0.066  | 6%       | 27.4 (5.6)  | 0.185  | 0%       | 26.8 (6.7)  | 4%       |
| Grober-Buschke test: sum of three total recalls       | 41.5 (5.7)                        | -0.086 | 17%      | 40.9 (6.2)       | -0.116 | 21%      | 43.5 (3.4)  | 0.012  | 7%       | 43.5 (4.2)  | 11%      |
| Grober-Buschke test: free delayed recall              | 10.0 (2.9)                        | 0.084  | 5%       | 9.5 (3.1)        | 0.076  | 7%       | 11.4 (1.9)  | 0.108  | 0%       | 11.3 (2.3)  | 7%       |
| Grober-Buschke test: total delayed recall             | 14.6 (1.8)                        | 0.026  | 8%       | 14.5 (1.9)       | 0.082  | 9%       | 15.1 (1.0)  | -0.145 | 7%       | 15.4 (1.1)  | 7%       |
| Visual memory                                         |                                   | -0.423 | 3%       |                  | -0.440 | 4%       |             | -0.370 | 0%       |             | 4%       |
| Doors test: test A                                    | 10.3 (1.6)                        | -0.165 | 4%       | 10.0 (1.7)       | -0.173 | 6%       | 11.1 (1.0)  | -0.142 | 0%       | 10.7 (1.3)  | 4%       |
| Doors test: test B                                    | 5.8 (1.9)                         | -0.689 | 14%      | 5.6 (1.9)        | -0.717 | 15%      | 6.4 (1.9)   | -0.598 | 12%      | 6.9 (2.0)   | 7%       |
| Visuospatial abilities                                |                                   | -0.274 | 8%       |                  | -0.377 | 10%      |             | 0.045  | 0%       |             | 0%       |
| Rey-Osterrieth complex figure: copy score             | 30.5 (4.6)                        | -0.149 | 9%       | 30.0 (4.9)       | -0.248 | 10%      | 32.1 (2.8)  | 0.161  | 6%       | 30.9 (3.3)  | 7%       |
| Number location (VOSP): total score                   | 8.8 (1.5)                         | -0.402 | 27%      | 8.6 (1.7)        | -0.505 | 25%      | 9.3 (0.9)   | -0.072 | 31%      | 9.5 (0.9)   | 7%       |
| Executive functions                                   |                                   | 0.152  | 0%       |                  | 0.207  | 0%       |             | -0.017 | 0%       |             | 0%       |
| TMT: time B/A                                         | 2.7 (0.8)                         | 0.080  | 3%       | 2.6 (0.8)        | 0.053  | 0%       | 2.9 (0.9)   | 0.166  | 13%      | 2.4 (0.7)   | 4%       |
| TMT: errors B                                         | 0.8 (1.0)                         | -0.088 | 5%       | 0.8 (1.1)        | -0.026 | 6%       | 0.7 (0.9)   | -0.280 | 0%       | 0.5 (0.9)   | 0%       |
| Stroop Victoria: time interference/colors             | 2.4 (1.0)                         | 0.485  | 3%       | 2.5 (1.1)        | 0.621  | 2%       | 2.2 (0.5)   | 0.077  | 6%       | 2.1 (0.5)   | 7%       |
| Stroop Victoria: total errors interference            | 1.0 (2.0)                         | 0.161  | 15%      | 1.2 (2.3)        | 0.138  | 18%      | 0.5 (0.9)   | 0.234  | 6%       | 0.4 (0.7)   | 11%      |
| Verbal fluencies: letter fluency                      | 18.9 (6.8)                        | -0.237 | 8%       | 18.2 (7.1)       | -0.209 | 4%       | 21.1 (5.5)  | -0.323 | 19%      | 23.9 (6.3)  | 4%       |
| Verbal fluencies: category fluency                    | 26.4 (8.5)                        | 0.224  | 2%       | 25.0 (8.1)       | 0.290  | 0%       | 30.9 (8.2)  | 0.019  | 6%       | 28.3 (6.7)  | 0%       |
| Subjective decline <sup>2</sup>                       |                                   |        |          |                  |        |          |             |        |          |             |          |
| FACT-Cog: PCI                                         | 53.9 (15.0)                       |        | 50%      | 51.7 (15.1)      |        | 57%      | 60.4 (12.8) |        | 29%      | 60.6 (9.3)  | 30%      |
| FACT-Cog: PCA                                         | 17.6 (5.5)                        |        | 42%      | 16.8 (5.4)       |        | 47%      | 20.2 (5.2)  |        | 29%      | 19.6 (4.0)  | 37%      |

ADT: patients treated with androgen deprivation therapy. ARPI: patients treated with androgen receptor pathway inhibitors. FACT-Cog: Functional Assessment of Cancer Therapy - Cognitive Function. HC: healthy controls without cancer. PCA: Perceived cognitive abilities. PCI: Perceived cognitive impairment. RCI: reliable change index. SD: standard deviation. TMT: Trail-Making Test. VOSP: Visual Object and Space Perception Battery. WAIS-III: Wechsler Adult Intelligent Scale, third edition.

<sup>1</sup> Proportion of participants declining in at least two objective domains.

<sup>2</sup> Proportion of participants with a FACT-Cog – PCI and PCA score decreasing ≥10% from baseline.

# Supplementary information 5D: Raw scores and RCI for cognitive decline at 12 months (unadjusted)

|                                                       | All patients (ADT+/-ARPI)<br>n=55 |        |          | ADT+ARPI<br>n=42 |        |          | ADT<br>n=13 |        |          | HC<br>n=29  |          |
|-------------------------------------------------------|-----------------------------------|--------|----------|------------------|--------|----------|-------------|--------|----------|-------------|----------|
|                                                       | mean (SD)                         | RCI    | declined | mean (SD)        | RCI    | declined | mean (SD)   | RCI    | declined | mean (SD)   | declined |
| Overall objective decline <sup>1</sup>                |                                   |        | 4%       |                  |        | 2%       |             |        | 8%       |             | 0%       |
| Processing speed/attention                            |                                   | -0.202 | 5%       |                  | -0.256 | 5%       |             | -0.027 | 8%       |             | 0%       |
| Digit symbol-coding (WAIS-III): correct reproductions | 44.9 (13.1)                       | -0.700 | 16%      | 41.5 (11.8)      | -0.877 | 19%      | 56.0 (10.6) | -0.125 | 8%       | 59.1 (14.9) | 7%       |
| TMT: time A                                           | 55.9 (18.5)                       | 0.296  | 9%       | 59.5 (18.3)      | 0.365  | 12%      | 44.5 (14.3) | 0.072  | 0%       | 43.1 (12.1) | 7%       |
| Working memory                                        |                                   | -0.184 | 0%       |                  | -0.297 | 0%       |             | 0.182  | 0%       |             | 0%       |
| Digit span (WAIS-III): score forward                  | 8.1 (1.8)                         | -0.100 | 16%      | 8.3 (1.8)        | -0.161 | 17%      | 7.7 (1.7)   | 0.096  | 15%      | 9.2 (2.2)   | 10%      |
| Digit span (WAIS-III): score backward                 | 5.0 (1.9)                         | -0.267 | 2%       | 4.8 (1.7)        | -0.432 | 2%       | 5.8 (2.1)   | 0.268  | 0%       | 6.1 (2.0)   | 0%       |
| Verbal memory                                         |                                   | -0.218 | 10%      |                  | -0.227 | 8%       |             | -0.191 | 15%      |             | 0%       |
| Grober-Buschke test: sum of three free recalls        | 24.9 (7.9)                        | -0.545 | 17%      | 23.7 (7.5)       | -0.693 | 20%      | 28.6 (8.5)  | -0.089 | 8%       | 30.3 (6.3)  | 3%       |
| Grober-Buschke test: sum of three total recalls       | 43.4 (5.3)                        | -0.259 | 8%       | 42.7 (5.8)       | -0.402 | 10%      | 45.4 (2.5)  | 0.182  | 0%       | 45.9 (2.5)  | 3%       |
| Grober-Buschke test: free delayed recall              | 10.6 (3.1)                        | -0.109 | 8%       | 10.4 (3.2)       | -0.080 | 8%       | 11.3 (2.5)  | -0.194 | 8%       | 12.1 (1.9)  | 0%       |
| Grober-Buschke test: total delayed recall             | 15.1 (1.5)                        | -0.058 | 16%      | 15.1 (1.6)       | 0.149  | 13%      | 15.2 (1.4)  | -0.664 | 23%      | 15.9 (0.3)  | 3%       |
| Visual memory                                         |                                   | -0.346 | 7%       |                  | -0.385 | 7%       |             | -0.220 | 8%       |             | 0%       |
| Doors test: test A                                    | 10.4 (1.4)                        | -0.240 | 7%       | 10.3 (1.5)       | -0.148 | 5%       | 10.8 (1.4)  | -0.533 | 15%      | 10.9 (1.1)  | 0%       |
| Doors test: test B                                    | 6.5 (2.3)                         | -0.451 | 11%      | 6.1 (2.1)        | -0.623 | 12%      | 7.9 (2.5)   | 0.093  | 8%       | 6.8 (2.2)   | 3%       |
| Visuospatial abilities                                |                                   | -0.112 | 2%       |                  | -0.157 | 2%       |             | 0.027  | 0%       |             | 3%       |
| Rey-Osterrieth complex figure: copy score             | 31.3 (2.9)                        | -0.132 | 4%       | 31.1 (3.2)       | -0.108 | 2%       | 32.1 (2.1)  | -0.208 | 8%       | 31.1 (3.4)  | 3%       |
| Number location (VOSP): total score                   | 8.9 (1.5)                         | -0.013 | 13%      | 8.7 (1.5)        | -0.100 | 15%      | 9.4 (1.7)   | 0.262  | 8%       | 9.2 (1.1)   | 7%       |
| Executive functions                                   |                                   | -0.110 | 2%       |                  | 0.016  | 2%       |             | -0.496 | 0%       |             | 0%       |
| TMT: time B/A                                         | 2.3 (0.7)                         | -0.116 | 18%      | 2.4 (0.6)        | 0.026  | 15%      | 2.3 (0.9)   | -0.581 | 25%      | 2.2 (0.5)   | 4%       |
| TMT: errors B                                         | 0.6 (0.9)                         | -0.223 | 37%      | 0.7 (0.9)        | 0.038  | 31%      | 0.3 (0.7)   | -1.072 | 58%      | 0.3 (0.5)   | 18%      |
| Stroop Victoria: time interference/colors             | 2.4 (0.7)                         | 0.453  | 6%       | 2.4 (0.8)        | 0.567  | 5%       | 2.24 (0.6)  | 0.114  | 8%       | 2.1 (0.4)   | 3%       |
| Stroop Victoria: total errors interference            | 0.9 (1.4)                         | -0.116 | 11%      | 1.0 (1.6)        | -0.198 | 12%      | 0.8 (0.7)   | 0.138  | 8%       | 0.5 (0.9)   | 7%       |
| Verbal fluencies: letter fluency                      | 18.0 (6.5)                        | -0.519 | 12%      | 17.6 (6.5)       | -0.461 | 10%      | 19.5 (6.7)  | -0.695 | 15%      | 24.6 (6.1)  | 7%       |
| Verbal fluencies: category fluency                    | 25.8 (7.6)                        | -0.303 | 19%      | 25.1 (7.5)       | -0.108 | 15%      | 28.1 (7.7)  | -0.889 | 31%      | 29.3 (7.0)  | 0%       |
| Subjective decline <sup>2</sup>                       |                                   |        |          |                  |        |          |             |        |          |             |          |
| FACT-Cog: PCI                                         | 54.9 (14.3)                       |        | 40%      | 53.5 (14.4)      |        | 46%      | 59.4 (13.6) |        | 23%      | 61.0 (7.7)  | 14%      |
| FACT-Cog: PCA                                         | 17.6 (5.6)                        |        | 42%      | 17.0 (5.9)       |        | 46%      | 19.4 (4.2)  |        | 31%      | 19.8 (3.9)  | 28%      |

ADT: patients treated with androgen deprivation therapy. ARPI: patients treated with androgen receptor pathway inhibitors. FACT-Cog: Functional Assessment of Cancer Therapy - Cognitive Function. HC: healthy controls without cancer. PCA: Perceived cognitive abilities. PCI: Perceived cognitive impairment. RCI: reliable change index. SD: standard deviation. TMT: Trail-Making Test. VOSP: Visual Object and Space Perception Battery. WAIS-III: Wechsler Adult Intelligent Scale, third edition.

<sup>1</sup> Proportion of participants declining in at least two objective domains.

<sup>2</sup> Proportion of participants with a FACT-Cog – PCI and PCA score decreasing ≥10% from baseline.
